# Supplementary material
Source: HighWire-hosted journal article supplement (http://www.ghspjournal.org/highwire/filestream/2203/field_highwire_adjunct_files/2/17-00087-Srinivasan-Supplement3.pdf)

**SUPPLEMENT 3.** Organogram of the Bihar and Jharkhand Project Teams

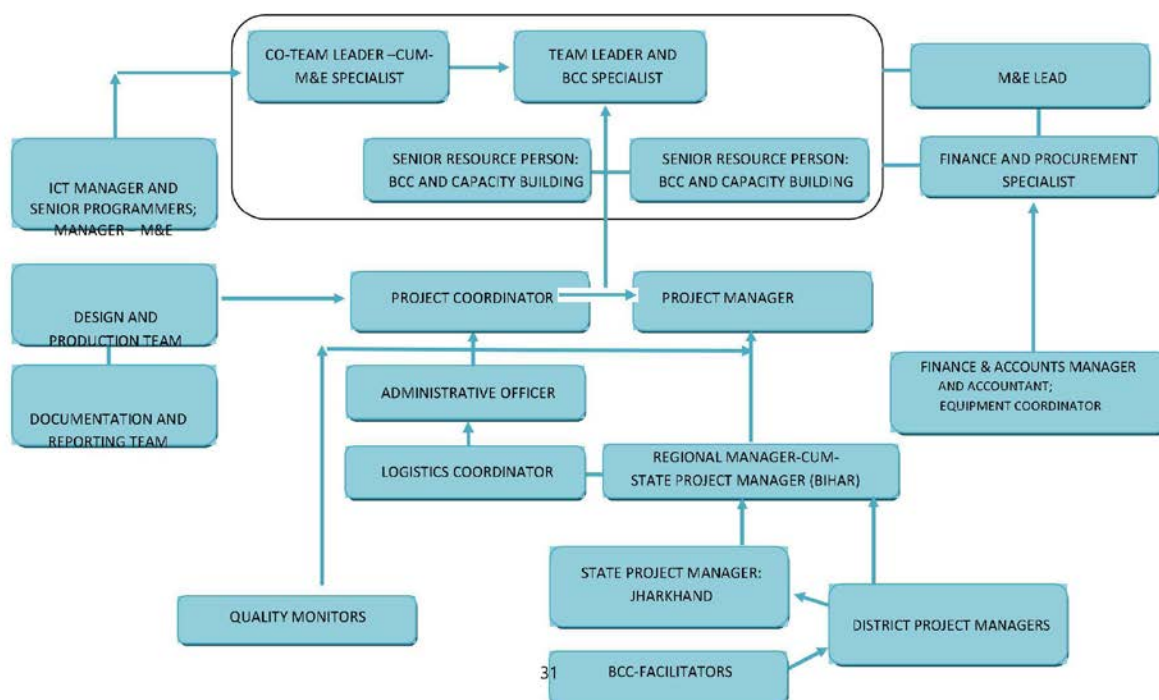

Supplement: 17-00087-Srinivasan-Supplement3.pdf [file 17-00087-Srinivasan-Supplement3.pdf]
